# Supplementary material
Source: PubMed Central journal article supplement (PMC9613521)
Supplement: NIHMS1824268-supplement-1.pdf [file NIHMS1824268-supplement-1.pdf]

Supplementary FIGURE 1

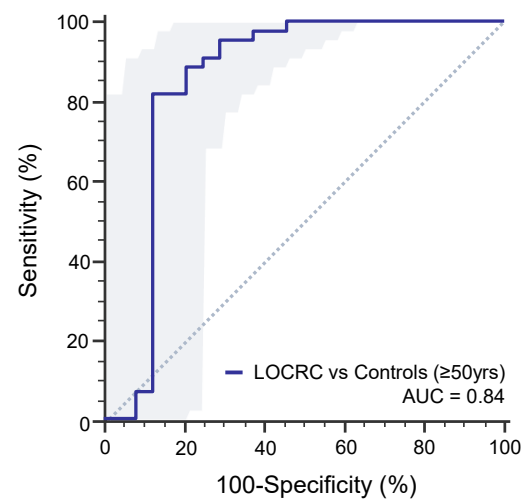

## Supplemental Figure and Table Legend

**Supplementary Figure 1:** Diagnostic potential evaluation of the miRNA biomarker panel to identify LOCRC patients from controls. ROC curve analysis to identify LOCRC patients from age-matched non-disease controls ( $\geq 50$  years old).

**Supplementary Table 1:** Recent studies reporting the clinical significance of 4 candidate miRNAs as cancer biomarkers

**Supplementary Table 2:** miRNA-mRNA network analysis of 4 candidate miRNAs

**Supplementary Table 1:** Recent studies reporting the clinical significance of 4 candidate miRNAs as cancer biomarkers

| <b>miRNA</b>    | <b>Cancers</b>                  | <b>Clinical significance</b>    | <b>Reference</b> |
|-----------------|---------------------------------|---------------------------------|------------------|
| hsa-miR-193a-5p | Pancreatic cancer               | Metastasis                      | 45               |
|                 | Colorectal cancer               | Prognosis                       | 46               |
| hsa-miR-210     | Brest cancer                    | Prognosis                       | 47               |
|                 | Head and neck cancer            | Prognosis                       | 48               |
|                 | Pancreatic cancer               | Diagnosis                       | 49               |
|                 | Brest cancer                    | Prognosis                       | 50               |
|                 | Clear cell renal cell carcinoma | Diagnosis                       | 51               |
|                 | Colorectal cancer               | Cancer detection, Prognosis     | 52               |
|                 | Non-small cell lung cancer      | Diagnosis                       | 53               |
|                 | Brest cancer                    | Prognosis                       | 54               |
| hsa-miR-513a-5p | Colorectal cancer               | Over-expressed in cancer tissue | 55               |
|                 | Giant cell tumor of bone        | Metastasis                      | 56               |
|                 | Colorectal cancer               | Liver metastasis                | 57               |
|                 | Brest cancer                    | Cancer detection                | 58               |
| hsa-miR-628-3p  | Pancreatic cancer               | Cancer detection                | 59               |
|                 | Lung cancer                     | Cancer detection                | 60               |

**Supplementary Table 2:** miRNA-mRNA network analysis of 4 candidate miRNAs

| miRNA-mRNA regulatory analysis |              |                |              |                 |              |                |              |
|--------------------------------|--------------|----------------|--------------|-----------------|--------------|----------------|--------------|
| miRNA                          | Target Genes | miRNA          | Target Genes | miRNA           | Target Genes | miRNA          | Target Genes |
| hsa-miR-193a-5p                | BLID         | hsa-miR-210-3p | IGF2         | hsa-miR-513a-5p | GNG13        | hsa-miR-628-3p | RBM41        |
|                                | DSG1         |                | GALR2        |                 | PNPLA7       |                | SINHCAF      |
|                                | ZNRD1        |                | ISCU         |                 | ARFGEF1      |                | MAMDC2       |
|                                | ACVR1        |                | KMT2D        |                 | EPS8         |                | PAIP1        |
|                                | CLCA2        |                | AIFM3        |                 | TNPO1        |                | EPHA7        |
|                                | CEP57        |                | NDUFA4       |                 | GCC2         |                | BEND4        |
|                                | CXorf67      |                | FGFRL1       |                 | SHISA7       |                | ATRX         |
|                                | TRAT1        |                | MID1IP1      |                 | DCUN1D4      |                | LSM12        |
|                                | YTHDF1       |                | BDNF         |                 | AGFG1        |                | SLC40A1      |
|                                | KDEL3        |                | RUNX3        |                 | ADAMTSL3     |                | ABCA13       |
|                                | DCLK1        |                | DENND6A      |                 | ARHGEF26     |                | ZNF197       |
|                                | DSCAML1      |                | GIT2         |                 | CSNK1G1      |                | SPAG1        |
|                                | SLC4A10      |                | SHISAL2B     |                 | EYA1         |                | DDX5         |
|                                | NETO2        |                | TTC13        |                 | ZNF329       |                | RICTOR       |
|                                | DMRT2        |                | SDF2         |                 | GXYLT1       |                | MED23        |
|                                | DDX58        |                | ACVR1B       |                 | BTG1         |                | SEPT7        |
|                                | DHX34        |                | PCYT1B       |                 | USP46        |                | PPP3CB       |
|                                | DGKK         |                | THSD7A       |                 | SEMA6A       |                | SGCD         |
|                                | ZNHIT6       |                | B4GALT5      |                 | NPAS3        |                | HSPBAP1      |
|                                | SLC30A5      |                | BARD1        |                 | PLEKHJ1      |                | PTTG1IP      |
